# Supplementary material
Source: PubMed Central journal article supplement (PMC3264354)
Supplement: supp_86.3.1638_JVI05911-11__supp_material_REV.pdf [file supp_86.3.1638_JVI05911-11__supp_material_REV.pdf]

## Supplemental material

### Small RNA deep-sequencing identifies microRNAs and other small non-coding RNAs from human herpesvirus 6 (HHV-6B)

Tuddenham *et al.*

#### Supplemental figure legends

##### **Figure S1. 5'RACE of B1 identifies a pre-miRNA antisense to hhv6b-miR-Ro6-3**

**A.** Representation of pre-miR-Ro6-3 (shaded) in relation to its antisense transcript, B1. Relative positions of the mature 5p and 3p forms of miR-Ro6-3 are indicated along with their respective read numbers from the Ago2 IP library in parenthesis (red). The identified cleavage site and the number of analyzed clones is indicated with a bold arrow, it is located 3' to the expected sites (dashed arrows) if B1 was cleaved by miR-Ro6-3 within Ago2. Genomic positions are given in reference to the Z29 strain of HHV-6B. **B.** Genomic location of the antisense miRNA in the left direct repeat (DR<sub>L</sub>) and observed sequencing reads from the Ago2IP library in reference to the Z29 strain. Nucleotides in bold match to the HST strain, underlined nucleotides do not match to either published genome; mm, mismatches to Z29. **C.** The antisense miR-Ro6-3 folds into a typical miRNA precursor, the mature miRNA is in bold; the star sequence is underlined. **D.** Northern blotting for miR-Ro6-3-5pAS, which was renamed miR-Ro6-4-3p, from total RNA (10 µg) and from RNA immunoprecipitated

with Ago2 (Ago2IP), or that of a control (BrdUIP). NI, non-infected; dpi, days post infection; IP, immunoprecipitation.

**Figure S2. HHV-6B pre-miRNA structures: interstrain/intervariant variation**

Secondary structure predictions for HHV-6B miRNAs based on cloned sequences aligned to the Z29 strain of HHV-6B; miRNAs are highlighted in bold, cloned star sequences are underlined. The predicted precursor for hhv6b-miR-Ro6-1 is fully conserved in both HHV-6B Z29 and HST strains as well as in HHV-6A. hhv6b-miR-Ro6-2 is conserved entirely between HST and Z29 strains, but presents with 91% conservation at the sequence level with HHV-6A. This variability in sequence does not affect the predicted pre-miRNA structure; there is a final base substitution for position 22 of the mature miRNA (orange). Due to the differences at the pre-miRNA level, this miRNA from HHV-6A is represented as a separate structure. hhv6b-miR-Ro6-3 presents with the greatest variability in mature miRNA sequence, and displays both interstrain and interviant sequence variations in the seed region of both the 3p and 5p arms for HHV-6B HST (red) and HHV-6A (orange) in relation to the HHV-6B Z29 strain.

## **Supplemental table legends**

### **Table S1. Major isoforms of HHV-6B miRNAs**

Sequences of the major isoforms of HHV-6B miRNAs are given along with their genomic position in respect to the left direct repeat region (DR<sub>L</sub>). Only those sequences cloned over 1000 times and found within Ago2 are represented in the table. HHV-6B miRNA can present with 5' and 3' heterogeneity, as well as present as shorter isoforms lacking a part of the 5' region of the miRNA. Sequences are given in reference to the Z29 strain of HHV-6B; mm, mismatches are given in parentheses.

### **Table S2. Sequence and genomic positions of miRNA candidates**

Sequences representing the major form of each candidate are presented. Viral sequences are given in reference to the Z29 strain of HHV-6B, sequences numbers are from Ago2 IP data; \* candidate sequence was not identified in Ago2 IP, clone numbers derive from small RNA library conducted from total RNA.

### **Table S3. Bioinformatic analysis of deep-sequencing datasets**

Small RNA reads obtained from libraries conducted from total RNA or from RNA immunoprecipitated with Ago2 were assessed for their candidacy as miRNAs using three web-based miRNA prediction programs: miRCat, miRDeep, and miRAnalyzer. Experimental evidence is also included for comparison. +, supportive data for the candidate miRNA; -, not-predicted as a miRNA; n/t, not tested; n/d not determinable; n/s, non-specific.

## Supplemental tables

**Table S1. Major isoforms of HHV-6B miRNAs**

| hhv6b-miR    | Reads | Length | Sequence               | Strand | Start | End (mm) |
|--------------|-------|--------|------------------------|--------|-------|----------|
| miR-Ro6-1    | 21403 | 22     | AAGCAGUCCCGAUCUAUGCGAC | -      | 7590  | 7611(0)  |
| miR-Ro6-1    | 1281  | 21     | AGCAGUCCCGAUCUAUGCGAC  | -      | 7590  | 7610(0)  |
| miR-Ro6-2    | 24242 | 22     | UUACAGUUUCCGCUGCCGCUGU | -      | 3754  | 3775(0)  |
| miR-Ro6-2    | 14090 | 21     | UUACAGUUUCCGCUGCCGCUG  | -      | 3755  | 3775(0)  |
| miR-Ro6-2    | 5029  | 22     | UUACAGUUUCCGCUGCCGCUGA | -      | 3754  | 3775(1)  |
| miR-Ro6-2    | 4513  | 16     | UUUCCGCUGCCGCUGU       | -      | 3754  | 3769(0)  |
| miR-Ro6-3-3p | 31540 | 21     | AGACCGAGCGGGCUCCAUCCG  | -      | 3097  | 3117(0)  |
| miR-Ro6-3-3p | 11489 | 20     | AGACCGAGCGGGCUCCAUC    | -      | 3098  | 3117(0)  |
| miR-Ro6-3-3p | 2862  | 17     | CGAGCGGGCUCCAUCCG      | -      | 3097  | 3113(0)  |
| miR-Ro6-3-3p | 2096  | 18     | CCGAGCGGGCUCCAUCCG     | -      | 3097  | 3114(0)  |
| miR-Ro6-3-3p | 1655  | 22     | AGACCGAGCGGGCUCCAUCCGA | -      | 3096  | 3117(1)  |
| miR-Ro6-3-3p | 1090  | 22     | AGACCGAGCGGGCUCCAUCCGC | -      | 3096  | 3117(0)  |
| miR-Ro6-3-3p | 1004  | 20     | GACCGAGCGGGCUCCAUCCG   | -      | 3097  | 3116(0)  |
| miR-Ro6-3-5p | 10293 | 21     | GACGGAGUCCGCUCGGUAUCG  | -      | 3128  | 3148(1)  |
| miR-Ro6-3-5p | 2237  | 20     | GACGGAGUCCGCUCGGUAUC   | -      | 3129  | 3148(1)  |
| miR-Ro6-3-5p | 1977  | 22     | ACGGAGUCCGCUCGGUAUCGCG | -      | 3126  | 3147(1)  |
| miR-Ro6-3-5p | 1109  | 22     | GACGGAGUCCGCUCGGUAUCGC | -      | 3127  | 3148(1)  |

**Table S2. Sequence and genomic positions of miRNA candidates**

| Candidate | Reads | Size | Sequence                 | Strand | Start | End (mm) |
|-----------|-------|------|--------------------------|--------|-------|----------|
| 2         | 98    | 23   | UUCGGGAUGUGCGGAGAAAGGGA  | -      | 2083  | 2105(0)  |
| 5 *       | 3     | 24   | UGGAUGUGUGGAAGCGUCAACGGC | -      | 27024 | 27047(0) |
| 6         | 80    | 23   | GCUGGCGCCGACCCUGCCGCGGC  | +      | 4318  | 4340(0)  |
| 7         | 1214  | 22   | GGUGAGAGAGUCGAGCGGGA     | -      | 1392  | 1413(0)  |
| 8         | 1639  | 22   | UGUUUUUGUGAUCGAAUCCACA   | -      | 68744 | 68765(0) |

**Table S3. Bioinformatic analysis of deep-sequencing datasets**

| Candidate | Defined as miRNA in this study | qPCR | Northern Total RNA | NORTHERN (AGO) | miRCat | miRCat (AGO) | miRAnalyzer v2.0 | miRAnalyzer v2.0 (AGO) | miRDeep v2.0 | miRDeep v2.0 (AGO) |
|-----------|--------------------------------|------|--------------------|----------------|--------|--------------|------------------|------------------------|--------------|--------------------|
| 1         | miR-Ro6-1                      | +    | +                  | +              | +      | +            | +                | -                      | +            | +                  |
| 1*        | miR-Ro6-1*                     | n/t  | n/t                | n/t            | +      | +            | +                | +                      | +            | +                  |
| 2         | -                              | +    | -                  | -              | -      | -            | +                | +                      | -            | -                  |
| 3-3p      | miR-Ro6-3-3p                   | +    | +                  | +              | +      | -            | +                | +                      | -            | +                  |
| 3-5p      | miR-Ro6-3-5p                   | n/t  | +                  | +              | -      | -            | +                | -                      | -            | +                  |
| 4         | miR-Ro6-2                      | +    | +                  | +              | +      | -            | -                | -                      | *            | +                  |
| 4*        | miR-Ro6-2*                     | n/t  | n/t                | n/t            | -      | -            | -                | +                      | *            | +                  |
| 5#        | -                              | -    | -                  | -              | -      | -            | +                | -                      | -            | -                  |
| 6         | -                              | n/s  | +                  | -              | -      | -            | -                | +                      | +            | -                  |
| 7         | -                              | n/d  | -                  | -              | -      | -            | -                | -                      | -            | -                  |
| 8         | -                              | n/d  | -                  | -              | -      | -            | -                | -                      | -            | -                  |
| -         | miR-Ro6-4*                     | n/t  | n/t                | n/t            | -      | -            | -                | +                      | -            | +                  |
| -         | miR-Ro6-4                      | n/t  | +                  | +              | -      | -            | +                | +                      | -            | +                  |

**Figure S1**

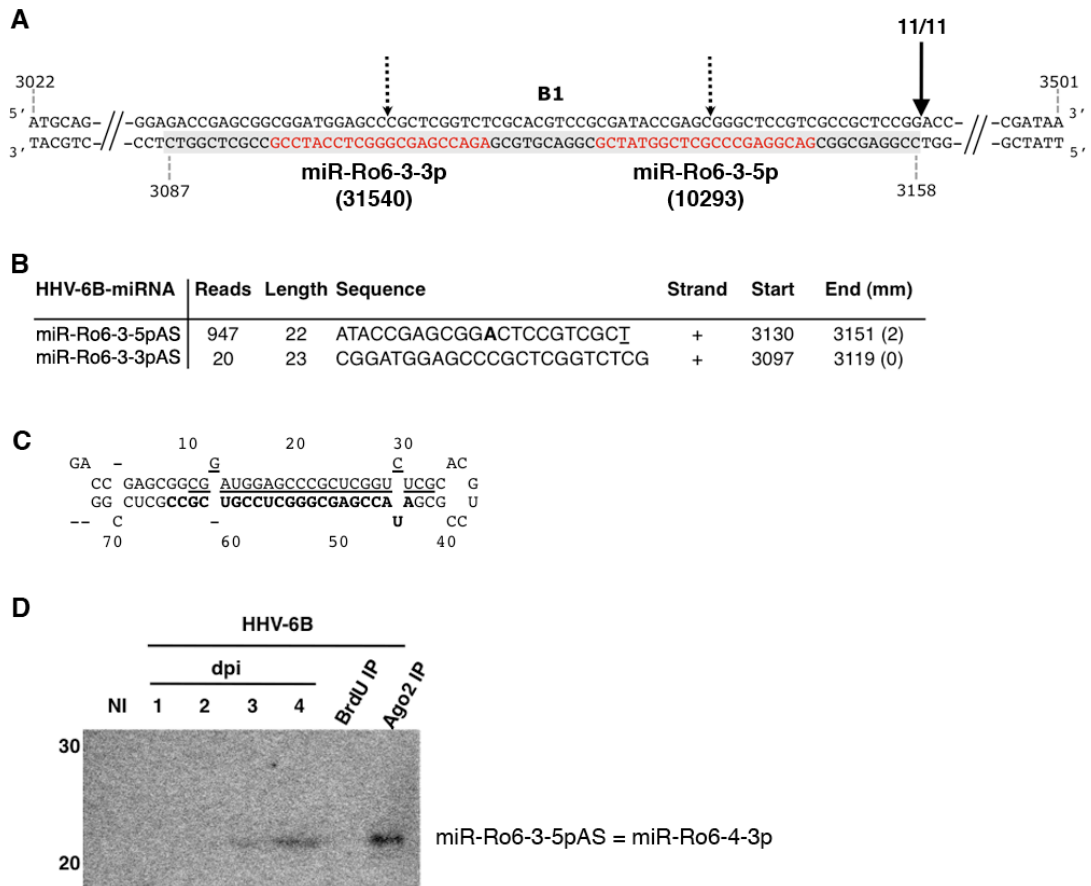

## Figure S2

### Candidate 1: hhv6b-miR-Ro6-1

```

      10      20      30
GCGCGCUUUCA - - - UCA
      AGCAGU CCGGAU CU AUGCGAC \
      UCGUCG GGGCUA GG UGCGCUG C
GAUA----- C C U UCC
      60      50      40

```

### Candidate 3: hhv6b-miR-Ro6-3

```

      10      20      30
-- G AC- A G
CCG AGCGGCG GGAGCCCGCUGGU UCGCG A
GGC UCGCCGC CCUCGGGCGAGCCA AGCGU C
CU - CUA G G
      70      60      50      40

```

### Candidate 4: hhv6b-miR-Ro6-2

```

      10      20      30
- --- C C C--- C U U U A
CGGCGAC AGC GC GC GC GU AC GUCAC GUUC \
GCCGCUG UCG CG CG UG CA UG CGGUG CAAG A
C GUG C U CCUU A U C - A
      80      70      60      50      40

```

### Candidate 4: hhv6a-miR-Ro6-2

```

      10      20      30      40
- CAA C C C CGUU C U - GA
CGGCGA CCGC GC GC GC ACUGU GC GUU CG \
GCCGCU GGCG CG CG CG UGACA UG CGG GC G
C --- U C U CCUU U C U AA
      80      70      60      50

```
